# Supplementary material
Source: MDPI journal article supplement (https://www.mdpi.com/2297-8739/10/2/65)
Supplement: s1 [file s1]

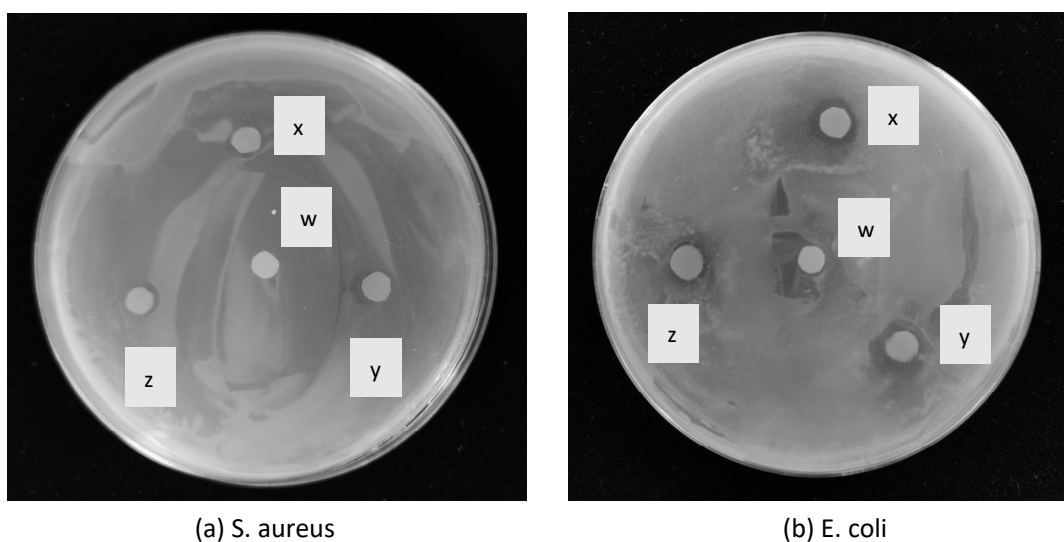

Figure S1. The DIZ of DES extracts (w: Control, x: 50mg/mL DES extract, y: 100mg/mL DES extract, z: 1mg/mL Rutin).

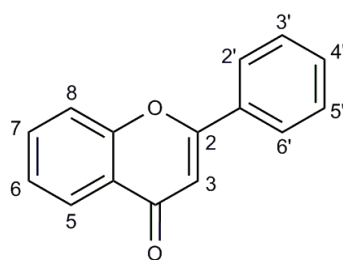

| No. | Flavonoids    | Substitutions |                          |
|-----|---------------|---------------|--------------------------|
|     |               | OH            | Others                   |
| 1   | Astragalin    | 5,7,4'        | 3- <i>O</i> -glucoside   |
| 2   | Hyperoside    | 5,7,3',4'     | 3- <i>O</i> -galactoside |
| 3   | Isoquercitrin | 5,7,3',4'     | 3- <i>O</i> -glucoside   |

Figure S2. The structures of astragalin, hyperoside and isoquercitrin.

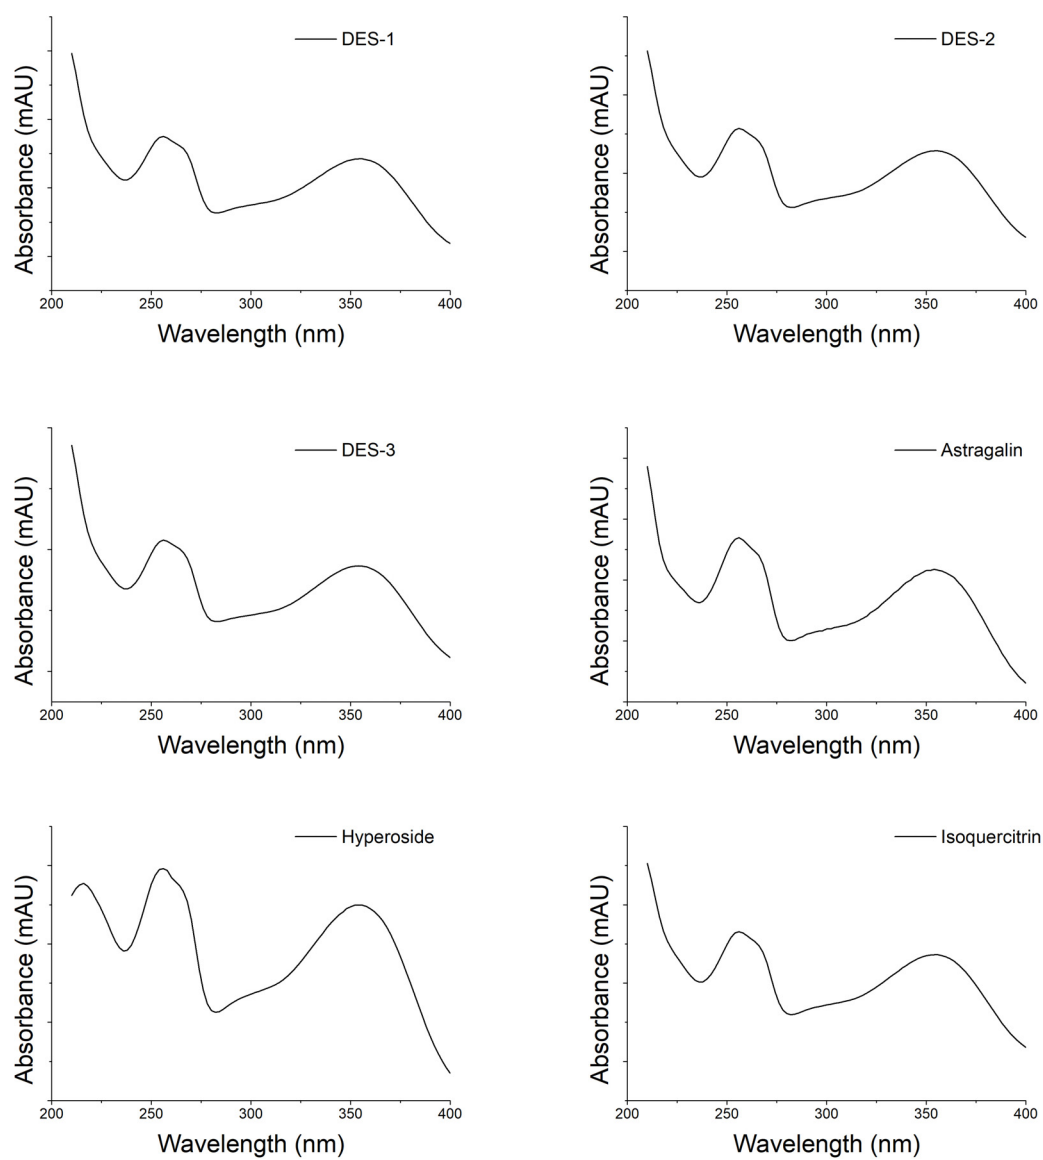

Figure S3. The UV spectra of three peaks in DES extract, astragalin, hyperoside and isoquercitrin.
